# Supplementary material
Source: Research Square preprint supplement (doi:10.21203/rs.3.rs-9540797/v1)
Supplement: Supplementary file 1 [file d1ad27cff1c510fa92bb1e5c.docx]

**Table 1.** Leaf Doctor Measurement for Leaf Samples across 6 Estates


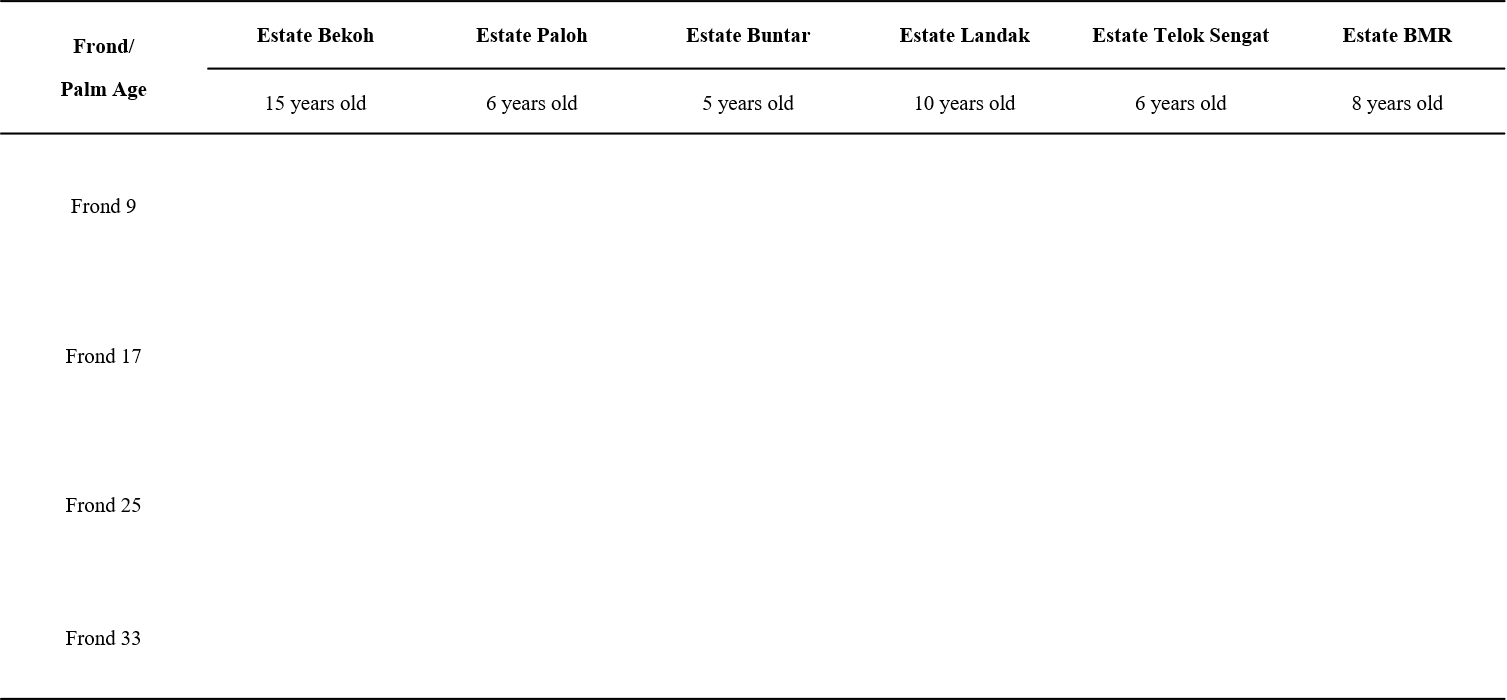

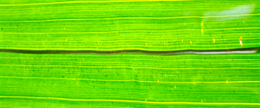

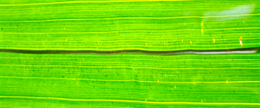

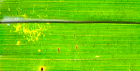

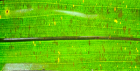

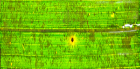

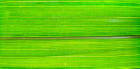

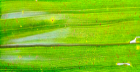

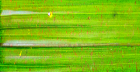

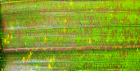

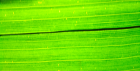

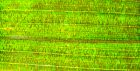

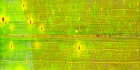

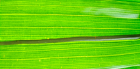

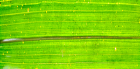

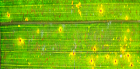

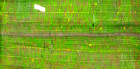

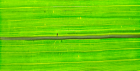

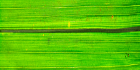

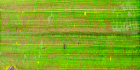

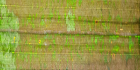

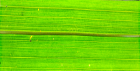

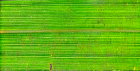

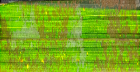

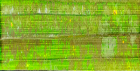


**Table 2.** Percentage of symptomatic leaf area for each frond (F9, F17, F25, F33) across different estates, assessed using Leaf Doctor. Values are presented as mean ± standard deviation (SD) (n = 18).

| Estate | % Symptomatic | % Symptomatic | % Symptomatic | % Symptomatic |
| --- | --- | --- | --- | --- |
| **F9** | **F17** | **F25** | **F33** |
| Buntar | 1%±0.004 | 22%±0.024 | 35%±0.043 | 71%±0.069 |
| Paloh | 3%±0.011 | 17%±0.025 | 29%±0.029 | 59%±0.053 |
| Bekoh | 2%±0.007 | 13%±0.023 | 32%±0.037 | 64%±0.039 |
| Landak | 2%0.007 | 22%±0.029 | 36%±0.036 | 71%±0.069 |
| Telok Sengat | 1%±0.006 | 17%±0.035 | 60%±0.049 | 84%±0.041 |
| BMR (Home) | 4%±0.015 | 18%±0.048 | 63%±0.047 | 81%±0.072 |

**Table 3.** Grouping of locations based on Dunn’s post Hoc Test. Values followed by different letters within each column are significantly different according to Dunn’s post-hoc test with Bonferroni adjustment (p<0.05) following Kruskal-Wallis analysis. (Adjusted P <0.05).

| Estates | Mild | Moderate | Severe |
| --- | --- | --- | --- |
| Bekoh | a | a | a |
| Buntar | b | b | b |
| Landak | b | b | b |
| Telok Sengat | ab | b | c |
| Paloh | ab | b | bc |
| BMR | ab | c | bc |

| **Fronds** | **Estate Bekoh** | **Estate Paloh** | **Estate Buntar** | **Estate Landak** | **Estate Teluk Sengat** | **Estate BMR** |
| --- | --- | --- | --- | --- | --- | --- |
| Frond 9 | 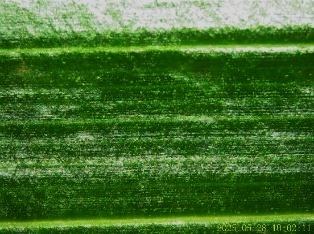 | 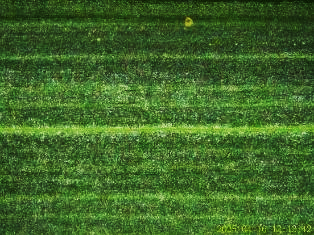 | 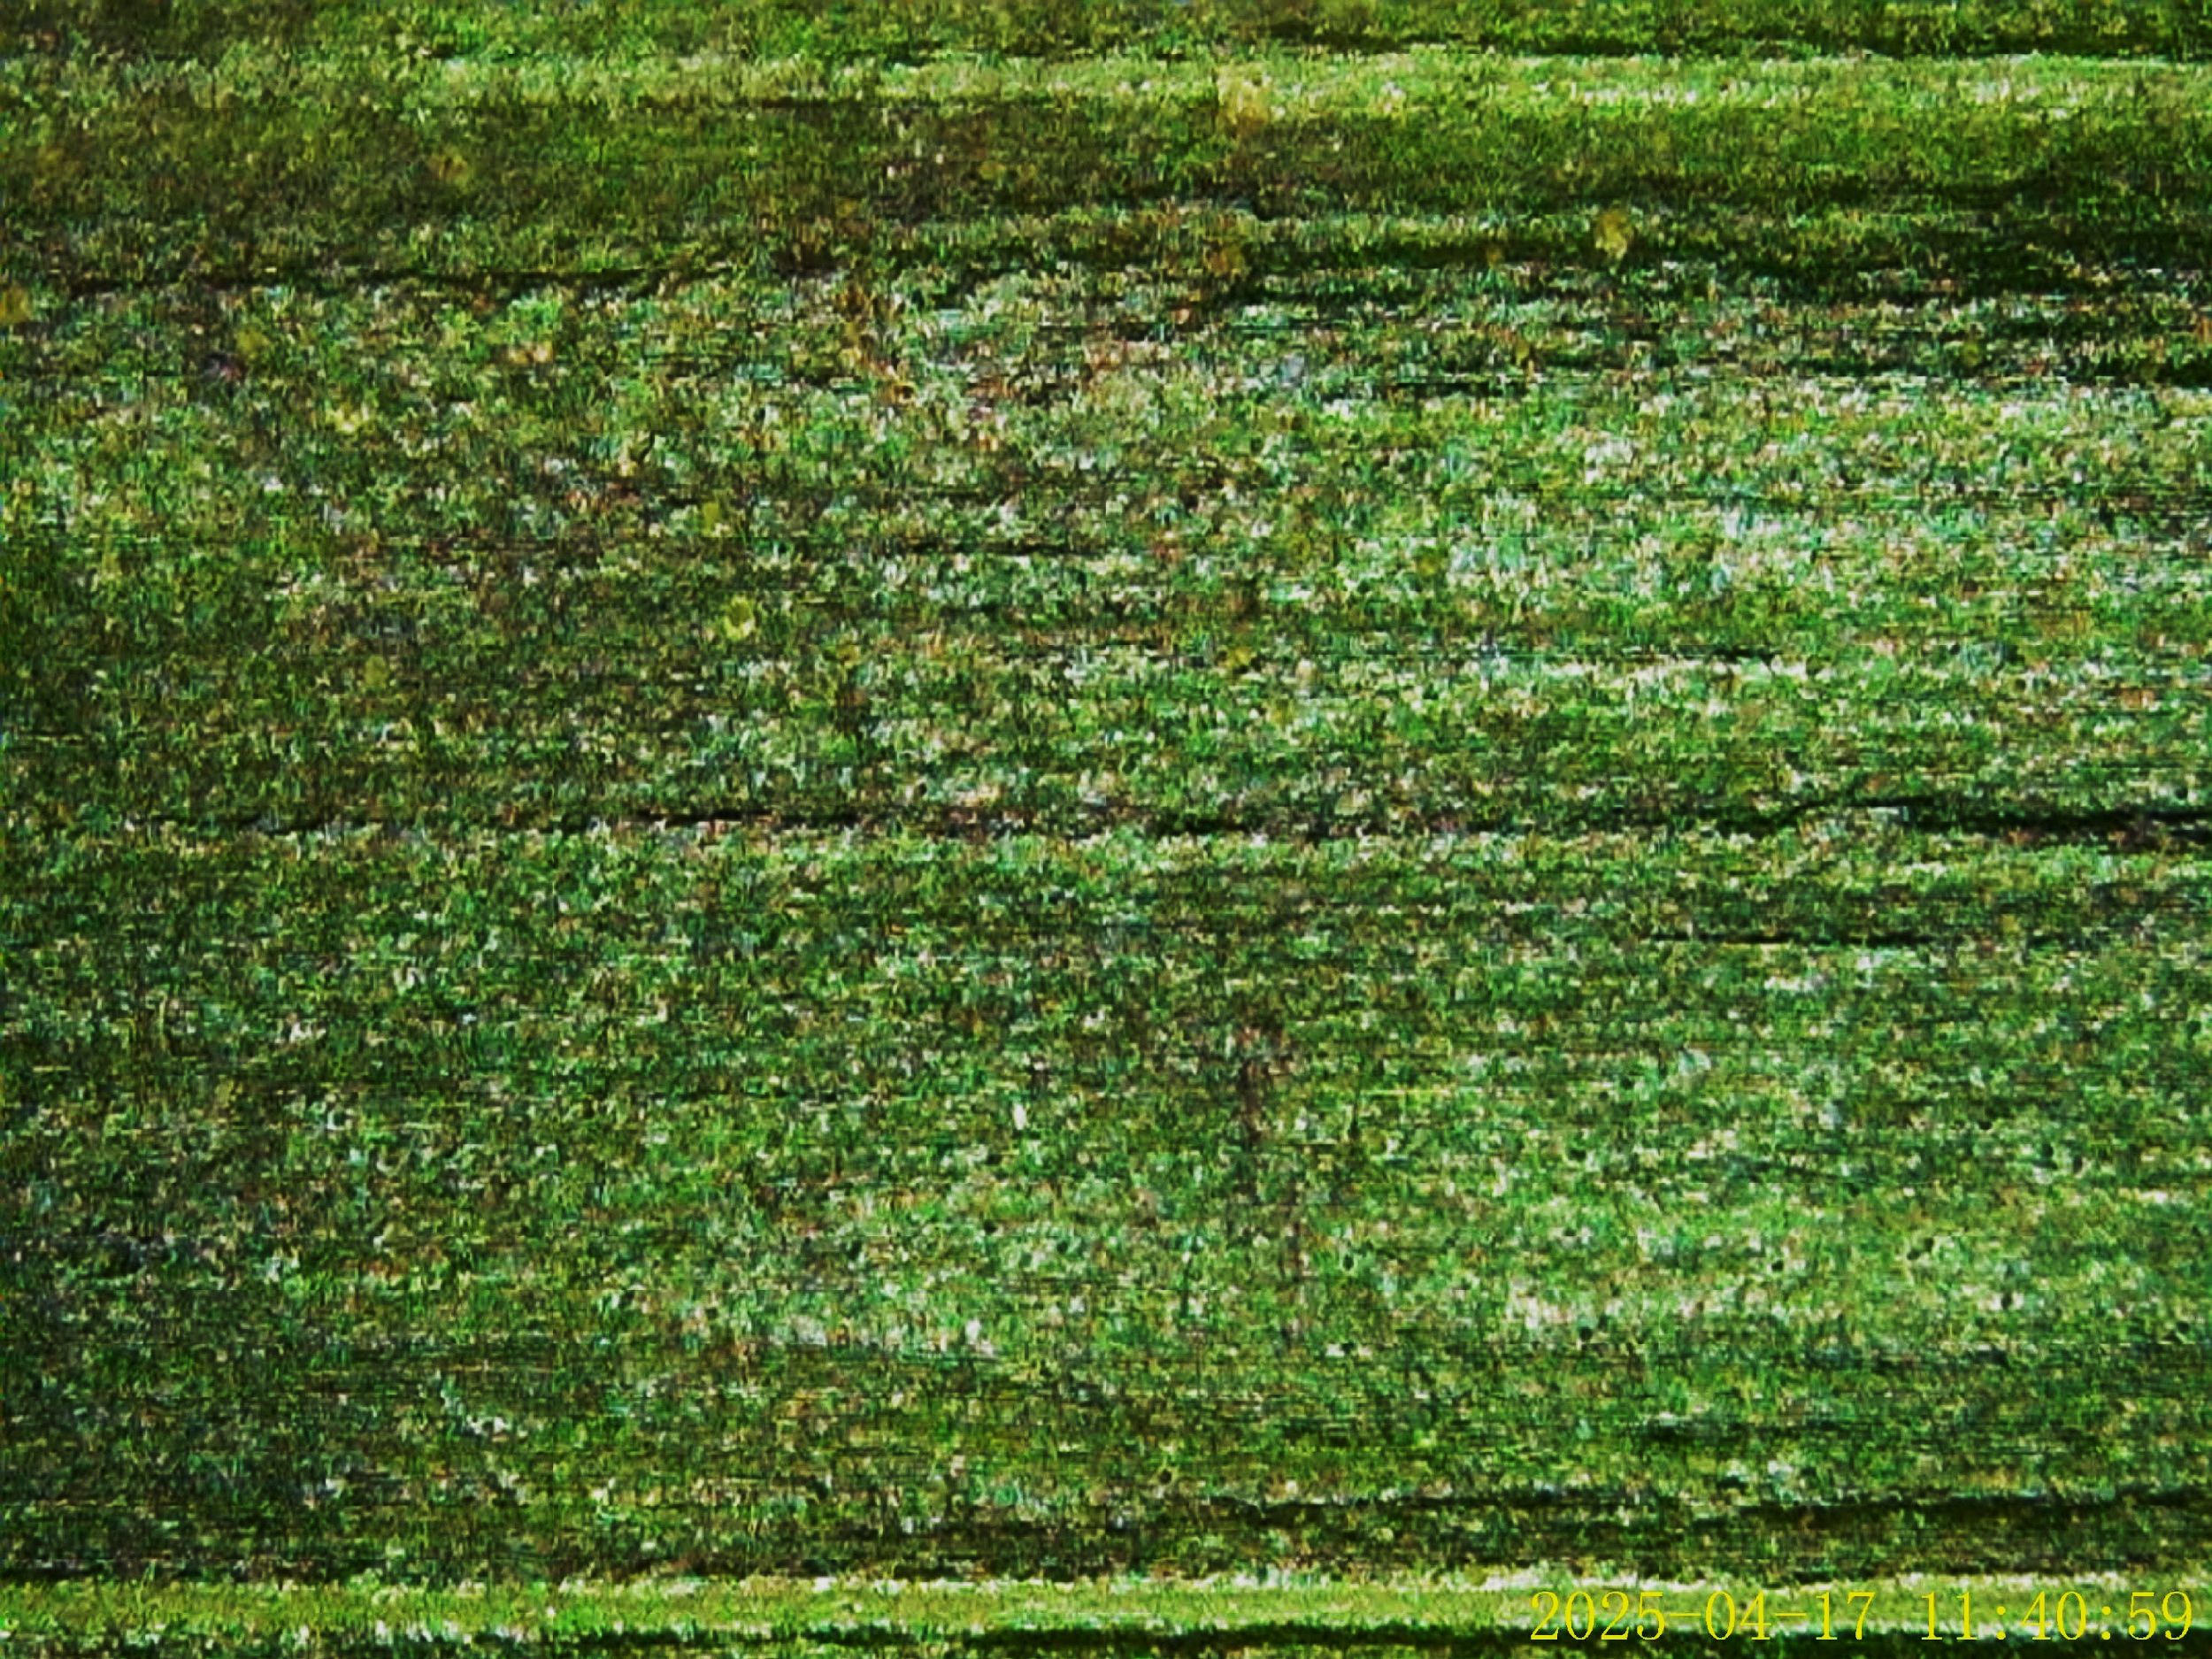 | 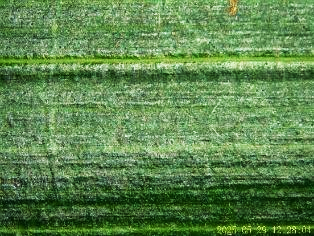 | 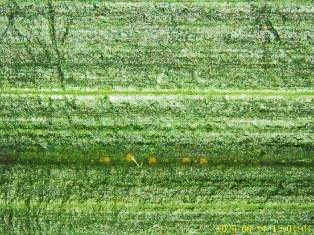 | 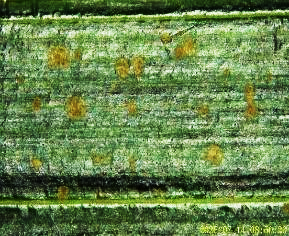 |
| Frond 17 | 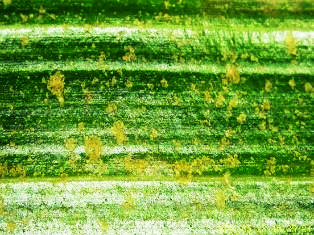 | 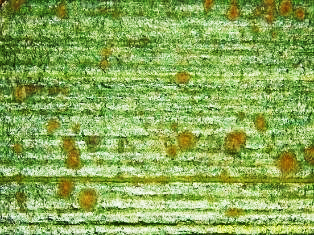 | 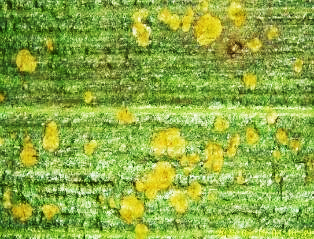 | 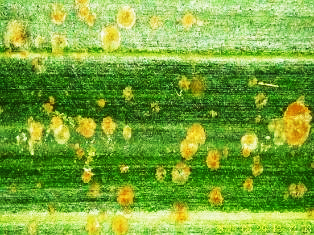 | 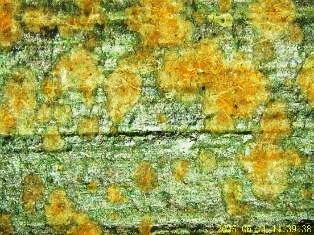 | 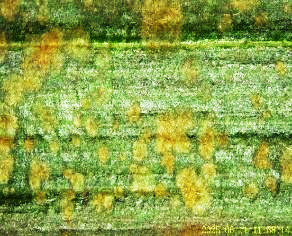 |
| Frond 25 | 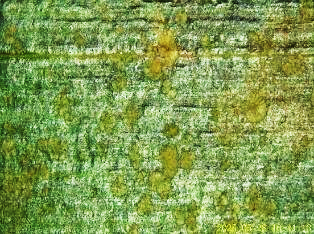 | 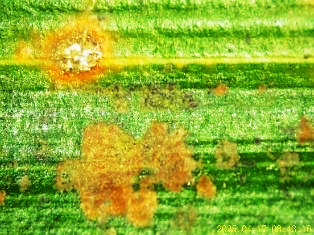 | 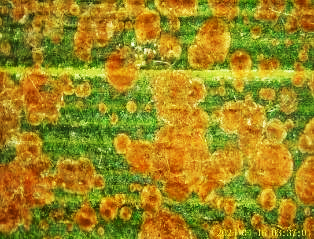 | 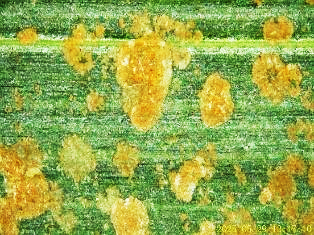 | 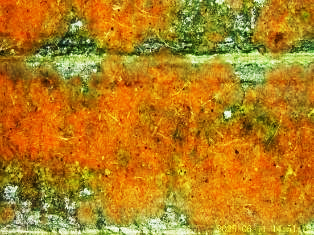 | 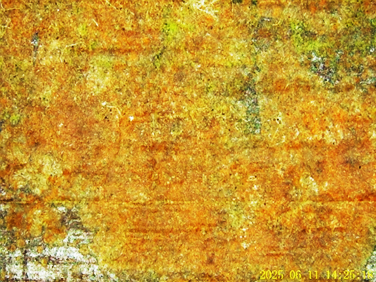 |
| Frond 33 | 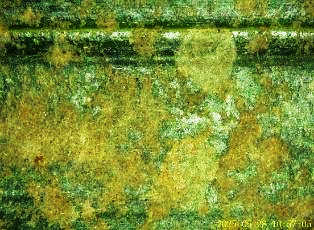 | 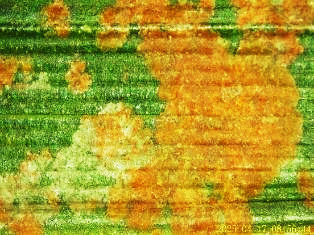 | 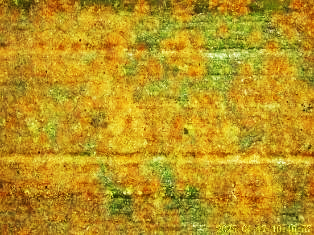 | 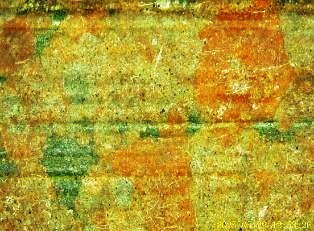 | 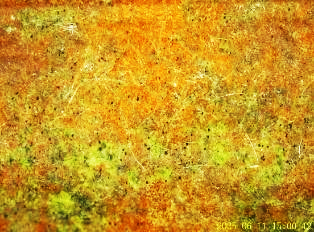 | 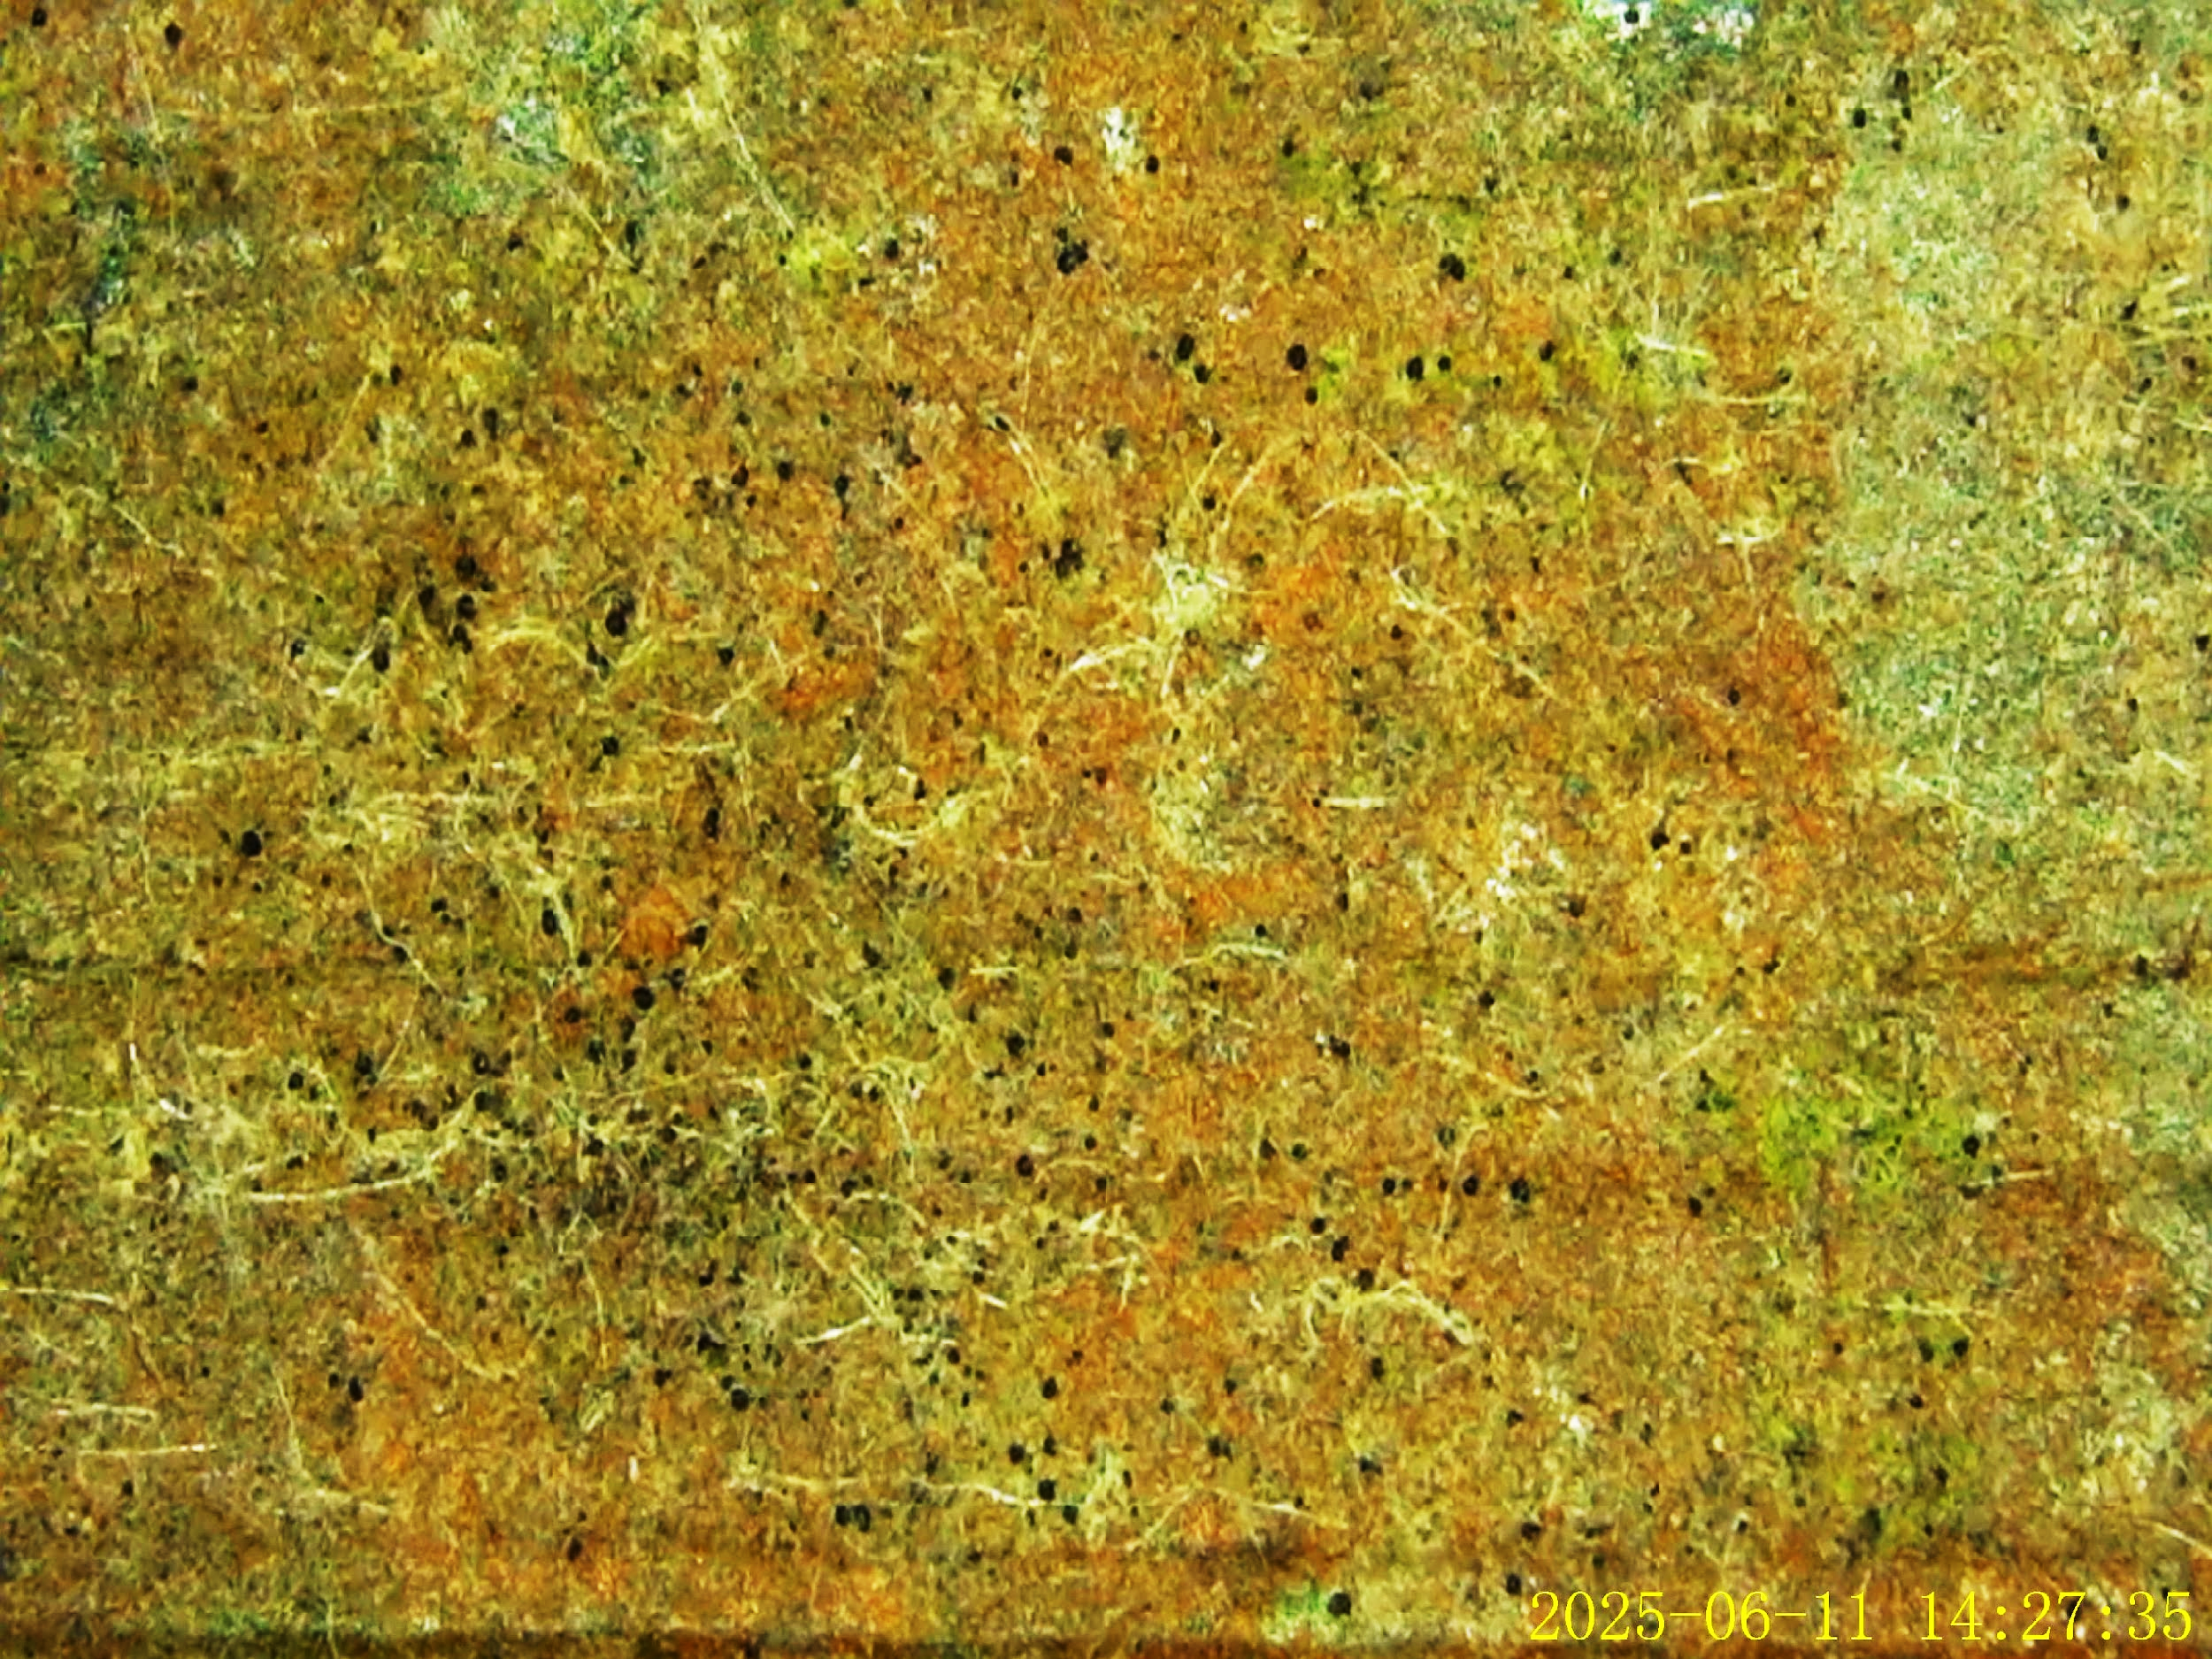 |

**Table 4.** Stereomicroscopic observation for Leaf Samples across 6 Estates
